# Supplementary material for: Paraburkholderia dioscoreae sp. nov., a novel plant associated growth promotor
Source: PubMed Central journal article supplement — Int J Syst Evol Microbiol. 2021 Sep 20;71(9):004969. doi: 10.1099/ijsem.0.004969 (PMC8549267; doi:10.1099/ijsem.0.004969), 2021-09-20
Supplement: ijsem-71-4969-s001.pdf [file ijsem-71-4969-s001.pdf]

# Supplementary Information

for

## *Paraburkholderia dioscoreae* sp. nov., a novel plant associated growth promotor

Johannes Herpell<sup>1</sup>, Sarah Vanwijnsberghe<sup>2</sup>, Charlotte Peeters<sup>2</sup>, Florian Schindler<sup>3</sup>, Lena Fragner<sup>1,3</sup>, Mersad Bejtović<sup>3</sup>, Wolfram Weckwerth<sup>1,3\*</sup> and Peter Vandamme<sup>2</sup>

<sup>1</sup>Molecular Systems Biology Division (MOSYS), Department of Functional and Evolutionary Ecology, University of Vienna, Althanstrasse 14, 1090 Vienna, Austria.

<sup>2</sup>Laboratory of Microbiology, Department of Biochemistry and Microbiology, Ghent University, K. L. Ledeganckstraat 35, 9000 Ghent, Belgium

<sup>3</sup>Vienna Metabolomics Center (VIME), University of Vienna, Althanstrasse 14, 1090 Vienna, Austria.

**Supplementary table S1.** Genomes used for the calculation of dDDH and orthoANIu values and the phylogenomic analysis using bcgTree.

| Isolate                                                       | Assembly        | BioProject  | Status          |
|---------------------------------------------------------------|-----------------|-------------|-----------------|
| <i>Paraburkholderia aromaticivorans</i> BN5 <sup>T</sup>      | GCA_002278075.1 | PRJNA398462 | Complete Genome |
| <i>Paraburkholderia aspalathi</i> LMG 27731 <sup>T</sup>      | GCA_900116445.1 | PRJEB17575  | Scaffold        |
| <i>Paraburkholderia bryophila</i> LMG 23644 <sup>T</sup>      | GCA_003269035.1 | PRJNA364284 | Scaffold        |
| <i>Paraburkholderia dioscoreae</i> sp. nov. Ch1-1             | GCA_000178415.2 | PRJNA40819  | Scaffold        |
| <i>Paraburkholderia dioscoreae</i> sp. nov. Msb3 <sup>T</sup> | GCA_902459535.1 | PRJEB33427  | Complete Genome |
| <i>Paraburkholderia dipogonis</i> ICMP 19430 <sup>T</sup>     | GCA_004402975.1 | PRJNA527764 | Contig          |
| <i>Paraburkholderia fungorum</i> NBRC 102489 <sup>T</sup>     | GCA_000685055.1 | PRJDB250    | Contig          |
| <i>Paraburkholderia ginsengisoli</i> NBRC 100965 <sup>T</sup> | GCA_000739735.1 | PRJDB251    | Contig          |
| <i>Paraburkholderia madseniana</i> RP11 <sup>T</sup>          | GCA_009690905.1 | PRJNA558488 | Scaffold        |
| <i>Paraburkholderia phenazinium</i> LMG 2247 <sup>T</sup>     | GCA_900100735.1 | PRJEB15886  | Scaffold        |
| <i>Paraburkholderia phytofirmans</i> PsJN <sup>T</sup>        | GCA_000020125.1 | PRJNA17463  | Complete Genome |
| <i>Paraburkholderia rhynchosiae</i> WSM 3937 <sup>T</sup>     | GCA_002879865.1 | PRJNA427925 | Contig          |
| <i>Paraburkholderia ribeironis</i> STM 7296 <sup>T</sup>      | GCA_900019265.2 | PRJEB10534  | Scaffold        |
| <i>Paraburkholderia sediminicola</i> LMG 24238 <sup>T</sup>   | GCA_902859805.1 | PRJEB37806  | Contig          |
| <i>Paraburkholderia terricola</i> LMG 20594 <sup>T</sup>      | GCA_900142195.1 | PRJEB18329  | Scaffold        |
| <i>Paraburkholderia ultramafica</i> LMG 28614 <sup>T</sup>    | GCA_902859915.1 | PRJEB37806  | Contig          |
| <i>Paraburkholderia xenovorans</i> LB400 <sup>T</sup>         | GCA_000013645.1 | PRJNA254    | Complete Genome |
| <i>Caballeronia glathei</i> DSM 50014 <sup>T</sup>            | GCA_000698595.1 | PRJNA238428 | Contig          |
| <i>Burkholderia cenocepacia</i> J2315 <sup>T</sup>            | GCA_000009485.1 | PRJNA339    | Complete Genome |
| <i>Pandoraea apista</i> DSM 16535 <sup>T</sup>                | GCA_001465595.2 | PRJNA305052 | Complete Genome |
